# Supplementary material
Source: Springer Nature journal article supplement (https://www.springermedizin.de/resource/supplementary/12958_2014_1268_MOESM6_ESM.pdf/9567188)

**Estradiol**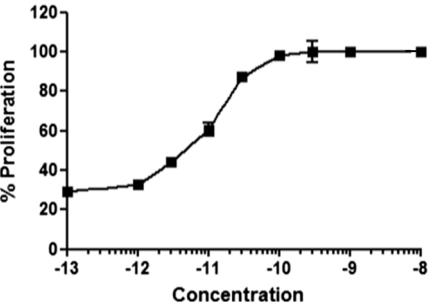**Chinese Herbal Medicine**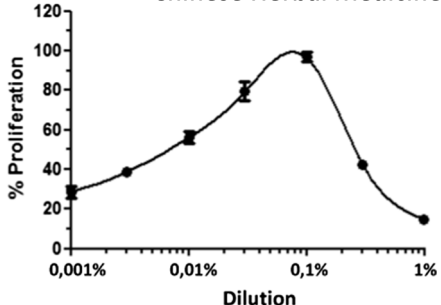

Supplement: MOESM6 [file 9567188]
